# Supplementary material for: Reevaluating the Role of Corticosteroids in Septic Shock: An Updated Meta-Analysis of Randomized Controlled Trials
Source: Hindawi journal article supplement (doi:10.1155/2019/3175047), 2019-06-10

## Supplementary Materials

**Table S1** Summary of search strategy

| Search No | Search strategy*                                                                                                       |
|-----------|------------------------------------------------------------------------------------------------------------------------|
| #1        | MeSH descriptor: [steroid] explode all trees                                                                           |
| #2        | MeSH descriptor: [corticosteroid] explode all trees<br>steroid* or glucocorticoid* or corticosteroid* or cortisone* or |
| #3        | hydrocortisone* or prednisolon* or methylprednisolon* or prednison* or<br>dexamethason* or triamcinolon* in All Text   |
| #4        | #1 or #2 or #3                                                                                                         |
| #5        | MeSH descriptor: [sepsis] explode all trees                                                                            |
| #6        | MeSH descriptor: [shock, septic] explode all trees                                                                     |
| #7        | seps* or septic* in All Text                                                                                           |
| #8        | #5 or #6 or #7<br><br>((randomized controlled trial or controlled clinical trial).pt. or                               |
| #9        | randomized.ab. or placebo.ab. or clinical trials as topic.sh. or randomly.ab.<br>or trial.ti.)                         |
| #10       | #4 and #8 and #9                                                                                                       |

\*This search strategy was adopted for following databases: PubMed, MEDLINE, EMBASE, Web of Science and Cochrane Central Register of Controlled Trials (CENTRAL).

**Table S2** Summary of previous research findings

| <b>Title</b>                                                                                                    | <b>Study (year)</b> | <b>Publish journal</b>                          | <b>Included trails</b> | <b>Participants</b>                      | <b>Subgroup analyse</b>                                                       | <b>Primary outcomes</b>                                                                                                                       | <b>Subgroup analyse outcomes</b>                                                                                 | <b>Adverse events</b>                                                                                                                                                                                     | <b>Conclusions</b>                                                                             |
|-----------------------------------------------------------------------------------------------------------------|---------------------|-------------------------------------------------|------------------------|------------------------------------------|-------------------------------------------------------------------------------|-----------------------------------------------------------------------------------------------------------------------------------------------|------------------------------------------------------------------------------------------------------------------|-----------------------------------------------------------------------------------------------------------------------------------------------------------------------------------------------------------|------------------------------------------------------------------------------------------------|
| Safety and Efficacy of Corticosteroids for the Treatment of Septic Shock: A Systematic Review and Meta-Analysis | Sligl W, 2009       | Clinical Infectious Diseases                    | 8                      | Adults with septic shock                 | Responders and non-responders based on corticotropin stimulation test         | 28-day all-cause mortality (RR, 1.00; 95% CI, 0.84–1.18, P=0.97)<br>Shock reversal (RR, 1.41; 95% CI, 1.22–1.64, P=)                          | Responders(RR, 0.95; 95% CI, 0.70- 1.28,P=0.72)<br>Nonresponders( RR, 0.90; 95% CI, 0.75–1.07,P=0.23)            | Superinfection(RR, 1.11; 95% CI, 0.86–1.42, P=0.42)                                                                                                                                                       | Corticosteroid therapy appears to be safe but does not reduce 28-day all-cause mortality rates |
| Corticosteroids in the Treatment of Severe Sepsis and Septic Shock in Adults                                    | Annane, 2009        | The Journal of the American Medical Association | 22                     | Severe Sepsis and Septic Shock in Adults | Long course of low-dose and short courses of high-dose corticosteroids        | 28-day all-cause mortality (RR,0.84; 95% CI, 0.71-1.00; P=.05).<br>Increased 28-day shock reversal(RR, 1.12; 95% CI, 1.02-1.23, P=.02)        | Prolonged low-dose corticosteroid suggests benefit on short-term mortality (RR, 0.84; 95% CI, 0.72- 0.97, P=.02) | No increasing the risk of gastroduodenal bleeding, superinfection and neuromuscular weakness.<br>Hyperglycemia (RR, 1.16; 95% CI, 1.07-1.25, P<001)<br>Hypernatremia (RR, 1.61; 95% CI, 1.26-2.06, P<001) | No clear benefit on mortality.                                                                 |
| Low-Dose Hydrocortisone Therapy Attenuates Septic Shock in Adult Patients but Does Not Reduce                   | Wang, 2014          | Society of Critical Care Anesthesiologists      | 8                      | Septic Shock in Adult                    | Subgroup analyses for sample size (< 100 or > 100) and quality score (6 or 7) | 28-day all-cause mortality (RR,0.84; 95% CI, 0.71-1.00; P=.05).<br>7-day and 28-day shock reversal (OR = 2.08, 95% CI, 1.58–2.73, P < 0.0001) | No clear benefit on mortality.<br>Benefit on shock reversal                                                      | No increasing the risk of gastroduodenal bleeding and superinfection.<br>Hyperglycemia (OR = 2.143, 95% CI, 1.41–3.26, P < 0.0001)                                                                        | Ameliorates septic shock at 7 and 28 days, but no benefit 28-day mortality                     |

|                                                                                |                |                            |                                                              |                       |                                                                                                                |                                                                                                                                                                                                   |                                       |                                                                                                                                                                                               |                                                                                                                                                                         |
|--------------------------------------------------------------------------------|----------------|----------------------------|--------------------------------------------------------------|-----------------------|----------------------------------------------------------------------------------------------------------------|---------------------------------------------------------------------------------------------------------------------------------------------------------------------------------------------------|---------------------------------------|-----------------------------------------------------------------------------------------------------------------------------------------------------------------------------------------------|-------------------------------------------------------------------------------------------------------------------------------------------------------------------------|
| 28-Day Mortality: A Meta-Analysis of Randomized Controlled Trials              |                |                            |                                                              |                       |                                                                                                                | and (OR = 1.50, 95% CI, 1.12–1.99, P = 0.006).                                                                                                                                                    |                                       |                                                                                                                                                                                               |                                                                                                                                                                         |
| Corticosteroids for treating sepsis                                            | Annane, 2015   | The Cochrane Collaboration | 33                                                           | Patients with sepsis  | Based on treatment dose/duration, methodological quality and targeted population (sepsis or only septic shock) | 28-day all-cause mortality (RR, 0.88; 95% CI 0.78 to 0.99, P=0.01)<br>7-day and 28-day shock reversal (OR = 1.31, 95% CI 1.14 to 1.51, P = 0.001) and (OR = 1.11, 95% CI 1.02 to 1.21; P = 0.01). | No information only for septic shock. | No information only for septic shock.                                                                                                                                                         | Benefit on mortality.                                                                                                                                                   |
| Corticosteroids in septic shock: a systematic review and network meta-analysis | Gibbison, 2017 | Critical Care              | Complete data from 22 studies and partial data from 1 study. | Septic Shock in Adult | Based on treatment regimen.                                                                                    | No clear evidence that any intervention or treatment regimen is better than any other across the spectrum of mortality. Benefit on shock reversal.                                                | No.                                   | No clear evidence that any one corticosteroid drug or treatment regimen is more likely to be effective reducing the incidence of gastrointestinal bleeding or superinfection in septic shock. | No clear evidence that any one corticosteroid drug or treatment regimen is more likely to be effective in reducing mortality. Hydrocortisone shows more shock reversal. |

**Fig. S1** PRISMA Checklist.

| Section/topic             | # | Checklist item                                                                                                                                                                                                                                                                                              | Reported on page # |
|---------------------------|---|-------------------------------------------------------------------------------------------------------------------------------------------------------------------------------------------------------------------------------------------------------------------------------------------------------------|--------------------|
| <b>TITLE</b>              |   |                                                                                                                                                                                                                                                                                                             |                    |
| Title                     | 1 | Identify the report as a systematic review, meta-analysis, or both.                                                                                                                                                                                                                                         | 1                  |
| <b>ABSTRACT</b>           |   |                                                                                                                                                                                                                                                                                                             |                    |
| Structured summary        | 2 | Provide a structured summary including, as applicable: background; objectives; data sources; study eligibility criteria, participants, and interventions; study appraisal and synthesis methods; results; limitations; conclusions and implications of key findings; systematic review registration number. | 3, 4               |
| <b>INTRODUCTION</b>       |   |                                                                                                                                                                                                                                                                                                             |                    |
| Rationale                 | 3 | Describe the rationale for the review in the context of what is already known.                                                                                                                                                                                                                              | 5                  |
| Objectives                | 4 | Provide an explicit statement of questions being addressed with reference to participants, interventions, comparisons, outcomes, and study design (PICOS).                                                                                                                                                  | 5                  |
| <b>METHODS</b>            |   |                                                                                                                                                                                                                                                                                                             |                    |
| Protocol and registration | 5 | Indicate if a review protocol exists, if and where it can be accessed (e.g., Web address), and, if available, provide registration information including registration number.                                                                                                                               | 6                  |
| Eligibility criteria      | 6 | Specify study characteristics (e.g., PICOS, length of follow-up) and report characteristics (e.g., years considered, language, publication status) used as criteria for eligibility, giving rationale.                                                                                                      | 7                  |
| Information sources       | 7 | Describe all information sources (e.g., databases with dates of coverage, contact with study authors to identify additional studies) in the search and date last searched.                                                                                                                                  | 6                  |
| Search                    | 8 | Present full electronic search strategy for at least one database, including any limits used, such that it could be                                                                                                                                                                                         | Table S1           |

|                                    |          |                                                                                                                                                                                                                        |                           |
|------------------------------------|----------|------------------------------------------------------------------------------------------------------------------------------------------------------------------------------------------------------------------------|---------------------------|
|                                    |          | repeated.                                                                                                                                                                                                              |                           |
| Study selection                    | 9        | State the process for selecting studies (i.e., screening, eligibility, included in systematic review, and, if applicable, included in the meta-analysis).                                                              | 7                         |
| Data collection process            | 10       | Describe method of data extraction from reports (e.g., piloted forms, independently, in duplicate) and any processes for obtaining and confirming data from investigators.                                             | 7                         |
| Data items                         | 11       | List and define all variables for which data were sought (e.g., PICOS, funding sources) and any assumptions and simplifications made.                                                                                  | 7                         |
| Risk of bias in individual studies | 12       | Describe methods used for assessing risk of bias of individual studies (including specification of whether this was done at the study or outcome level), and how this information is to be used in any data synthesis. | 8                         |
| Summary measures                   | 13       | State the principal summary measures (e.g., risk ratio, difference in means).                                                                                                                                          | 8                         |
| Synthesis of results               | 14       | Describe the methods of handling data and combining results of studies, if done, including measures of consistency (e.g., $I^2$ ) for each meta-analysis.                                                              | 8                         |
| <b>Section/topic</b>               | <b>#</b> | <b>Checklist item</b>                                                                                                                                                                                                  | <b>Reported on page #</b> |
| Risk of bias across studies        | 15       | Specify any assessment of risk of bias that may affect the cumulative evidence (e.g., publication bias, selective reporting within studies).                                                                           | 8                         |
| Additional analyses                | 16       | Describe methods of additional analyses (e.g., sensitivity or subgroup analyses, meta-regression), if done, indicating which were pre-specified.                                                                       | 8-9                       |
| <b>RESULTS</b>                     |          |                                                                                                                                                                                                                        |                           |
| Study selection                    | 17       | Give numbers of studies screened, assessed for eligibility, and included in the review, with reasons for exclusions at each stage, ideally with a flow diagram.                                                        | 9 and Fig. 1              |

|                               |    |                                                                                                                                                                                                          |               |
|-------------------------------|----|----------------------------------------------------------------------------------------------------------------------------------------------------------------------------------------------------------|---------------|
| Study characteristics         | 18 | For each study, present characteristics for which data were extracted (e.g., study size, PICOS, follow-up period) and provide the citations.                                                             | 9 and Table 1 |
| Risk of bias within studies   | 19 | Present data on risk of bias of each study and, if available, any outcome level assessment (see item 12).                                                                                                | 10 and Fig. 2 |
| Results of individual studies | 20 | For all outcomes considered (benefits or harms), present, for each study: (a) simple summary data for each intervention group (b) effect estimates and confidence intervals, ideally with a forest plot. | 10-12         |
| Synthesis of results          | 21 | Present results of each meta-analysis done, including confidence intervals and measures of consistency.                                                                                                  | Table 2       |
| Risk of bias across studies   | 22 | Present results of any assessment of risk of bias across studies (see Item 15).                                                                                                                          | 10            |
| Additional analysis           | 23 | Give results of additional analyses, if done (e.g., sensitivity or subgroup analyses, meta-regression [see Item 16]).                                                                                    | 13 and Fig. 3 |
| <b>DISCUSSION</b>             |    |                                                                                                                                                                                                          |               |
| Summary of evidence           | 24 | Summarize the main findings including the strength of evidence for each main outcome; consider their relevance to key groups (e.g., healthcare providers, users, and policy makers).                     | 13-16         |
| Limitations                   | 25 | Discuss limitations at study and outcome level (e.g., risk of bias), and at review-level (e.g., incomplete retrieval of identified research, reporting bias).                                            | 17            |
| Conclusions                   | 26 | Provide a general interpretation of the results in the context of other evidence, and implications for future research.                                                                                  | 17            |
| <b>FUNDING</b>                |    |                                                                                                                                                                                                          |               |
| Funding                       | 27 | Describe sources of funding for the systematic review and other support (e.g., supply of data); role of funders for the systematic review.                                                               | 18            |

From: Moher D, Liberati A, Tetzlaff J, Altman DG, The PRISMA Group (2009). Preferred Reporting Items for Systematic Reviews and Meta-Analyses: The PRISMA Statement. PLoS Med 6(6): e1000097. doi:10.1371/journal.pmed1000097 For more information, visit: [www.prisma-statement.org](http://www.prisma-statement.org).

**Fig. S2** Summary of findings table

| corticosteroids for septic shock                  |                                          |                                    |                           |                              |                                 |          |
|---------------------------------------------------|------------------------------------------|------------------------------------|---------------------------|------------------------------|---------------------------------|----------|
| Patient or population: patients with septic shock |                                          |                                    |                           |                              |                                 |          |
| Settings:                                         |                                          |                                    |                           |                              |                                 |          |
| Intervention: corticosteroids                     |                                          |                                    |                           |                              |                                 |          |
| Outcomes                                          | Illustrative comparative risks* (95% CI) |                                    | Relative effect (95% CI)  | No of Participants (studies) | Quality of the evidence (GRADE) | Comments |
|                                                   | Assumed risk Control                     | Corresponding risk Corticosteroids |                           |                              |                                 |          |
| 28-day all cause mortality<br>Follow-up: 3 months | Study population                         |                                    | RR 0.93<br>(0.88 to 0.99) | 9043<br>(21 studies)         | ⊕⊕⊕⊖<br>moderate <sup>1</sup>   |          |
|                                                   | 312 per 1000                             | 290 per 1000<br>(274 to 309)       |                           |                              |                                 |          |
|                                                   | Moderate                                 |                                    |                           |                              |                                 |          |
|                                                   | 333 per 1000                             | 310 per 1000<br>(293 to 330)       |                           |                              |                                 |          |

\*The basis for the assumed risk (e.g. the median control group risk across studies) is provided in footnotes. The corresponding risk (and its 95% confidence interval) is based on the assumed risk in the comparison group and the relative effect of the intervention (and its 95% CI).

CI: Confidence interval; RR: Risk ratio.

GRADE Working Group grades of evidence  
 High quality: Further research is very unlikely to change our confidence in the estimate of effect.  
 Moderate quality: Further research is likely to have an important impact on our confidence in the estimate of effect and may change the estimate.  
 Low quality: Further research is very likely to have an important impact on our confidence in the estimate of effect and is likely to change the estimate.  
 Very low quality: We are very uncertain about the estimate.

<sup>1</sup> Benefit-to-risk ratio of some studies, remains controversial.



**Fig. S3** Forest plots of comparison corticosteroids versus control of ICU mortality(a) and hospital mortality(b).

**a.**

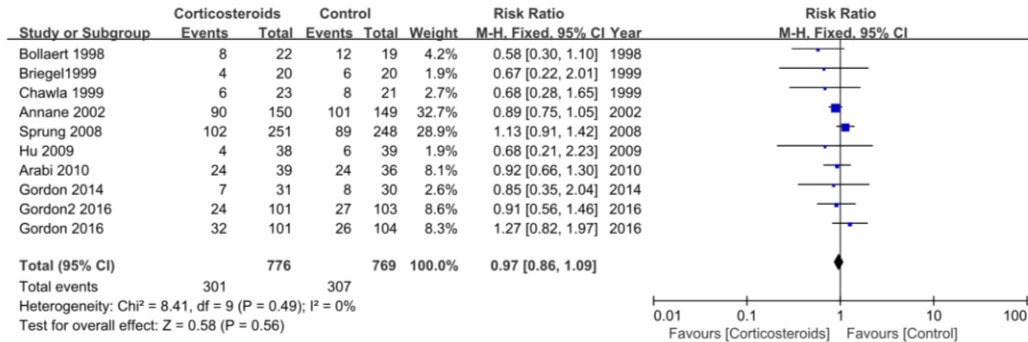

**b.**

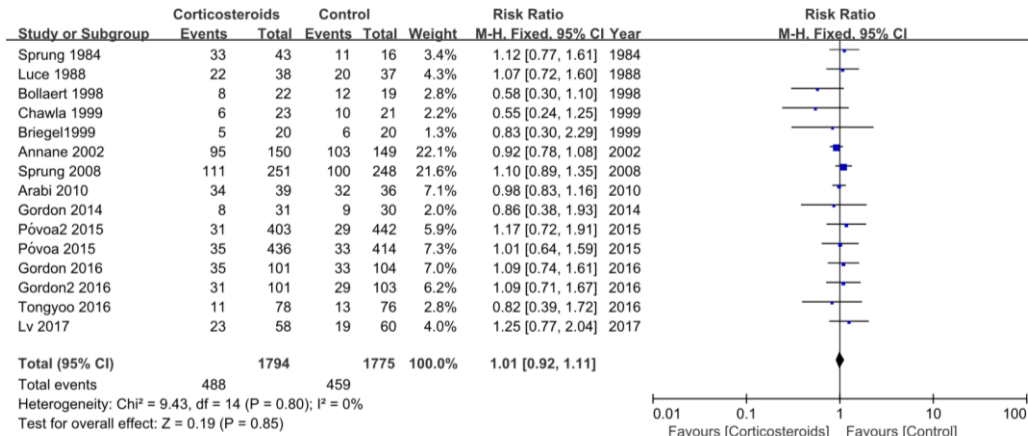

**Fig. S4** Forest plots of comparison corticosteroids versus control of length of ICU stay (a) and hospital stay for all participants (b).

**a.**

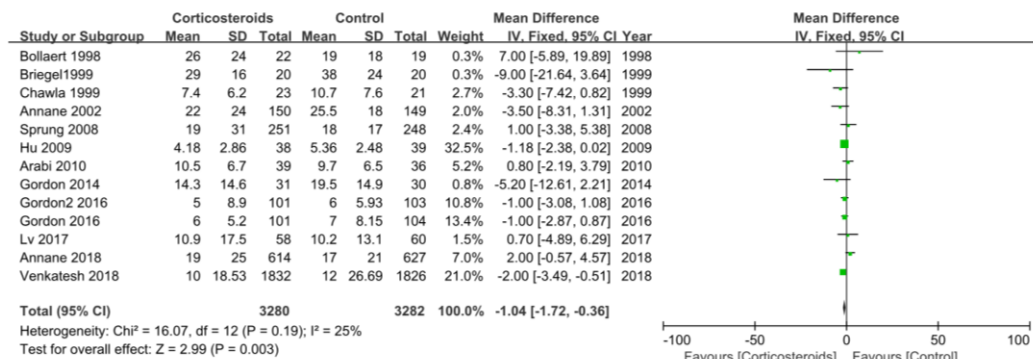

**b.**

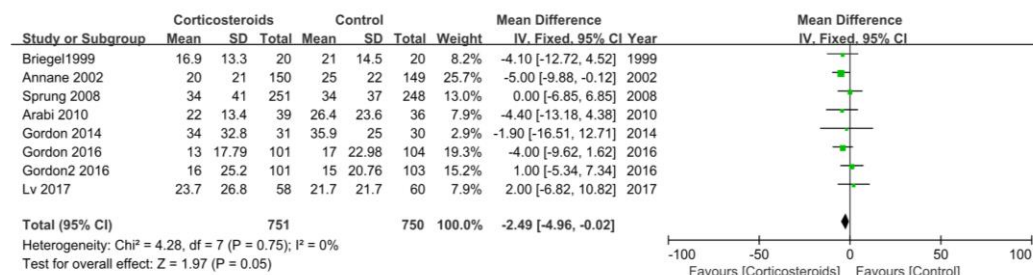

**Fig. S5** Forest plots of comparison corticosteroids versus control of mechanical ventilation free days (a) and duration of mechanical ventilation (b) for all participants.

**a.**

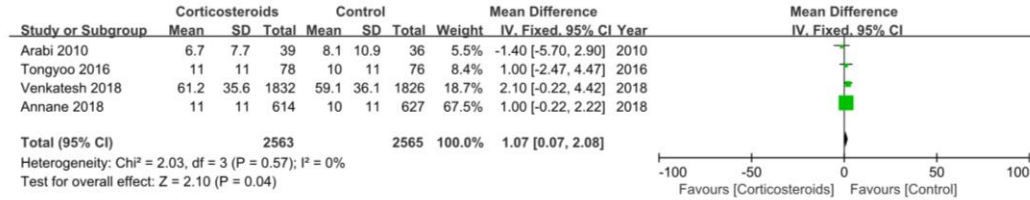

**b.**

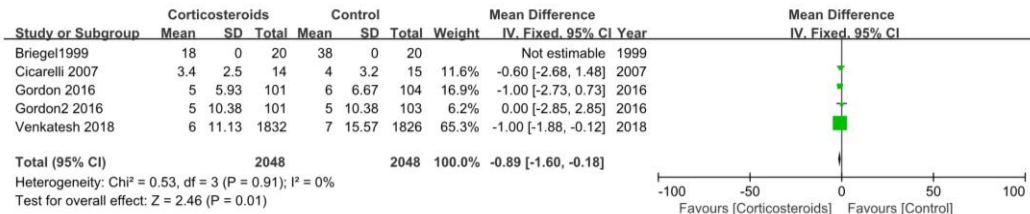

**Fig. S6** Forest plots of comparison corticosteroids versus control of adverse events, including gastroduodenal bleeding (a), superinfections (b) and hyperglycaemia(c).

**a.**

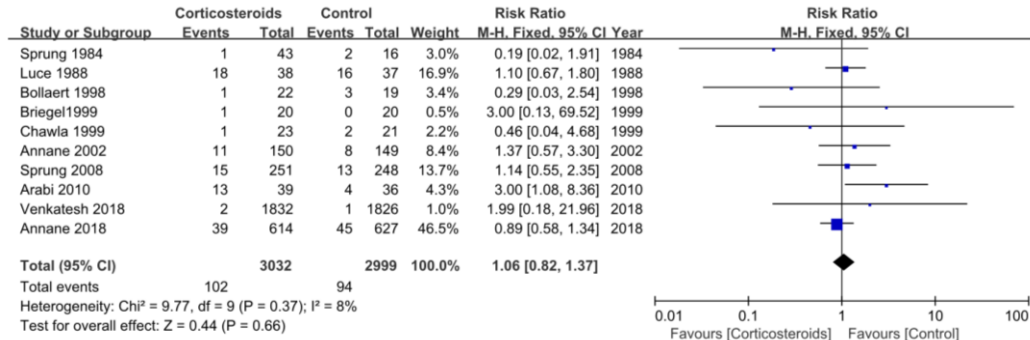

**b.**

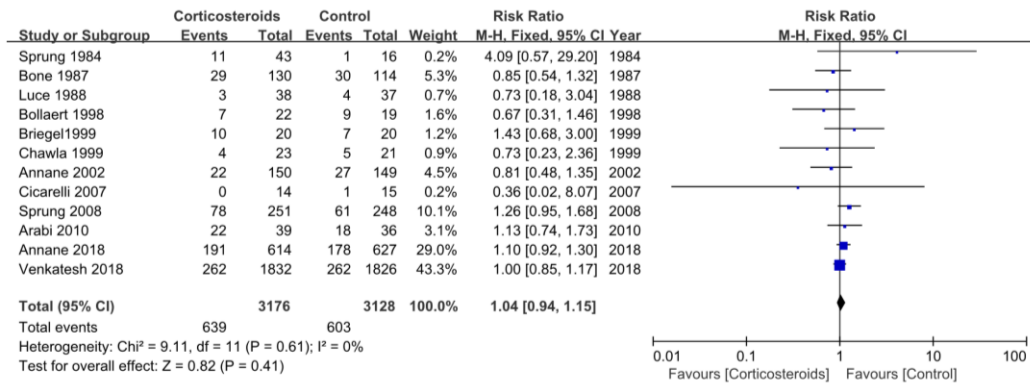

**c.**

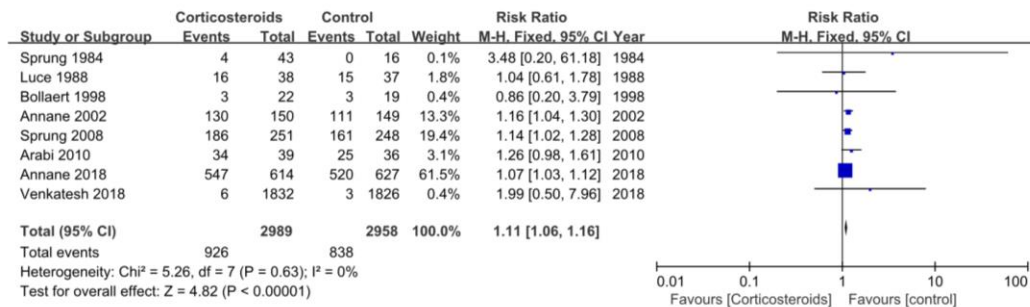

**Fig. S7** Forest plots of comparison corticosteroids versus control of 28-day all-cause mortality by subgroups based on treatment dose and course (a), whether concomitant mineralocorticoid (b), date of publication (c), and size sample(d).

**a.**

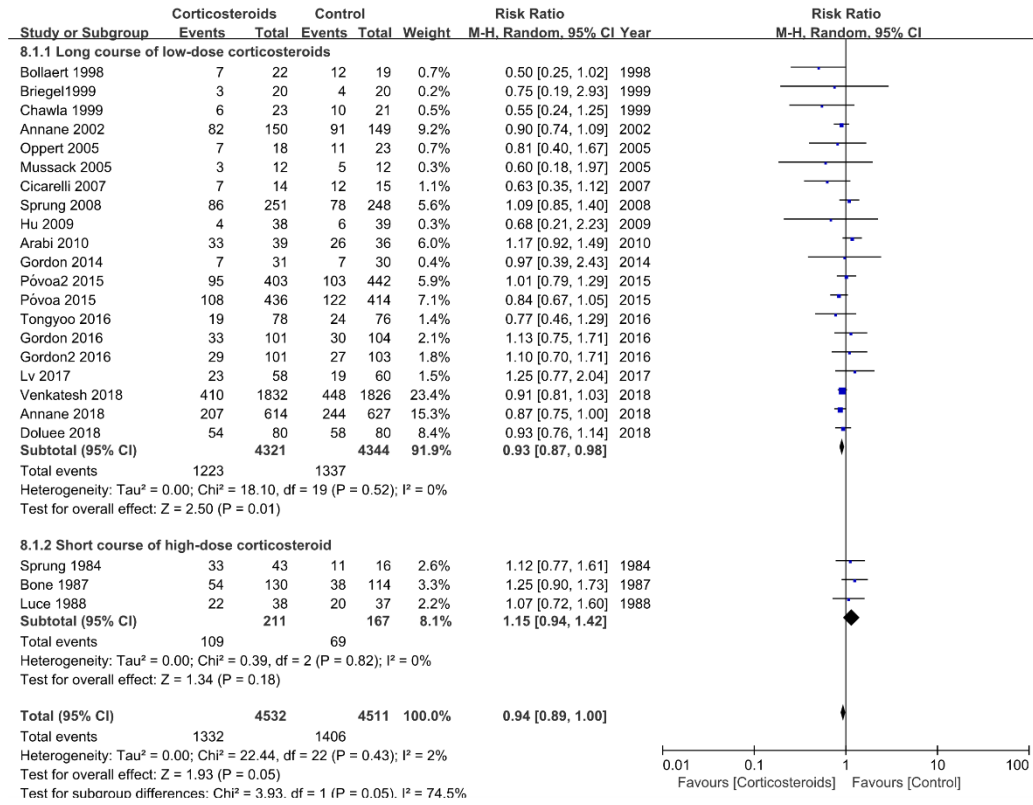

**b.**

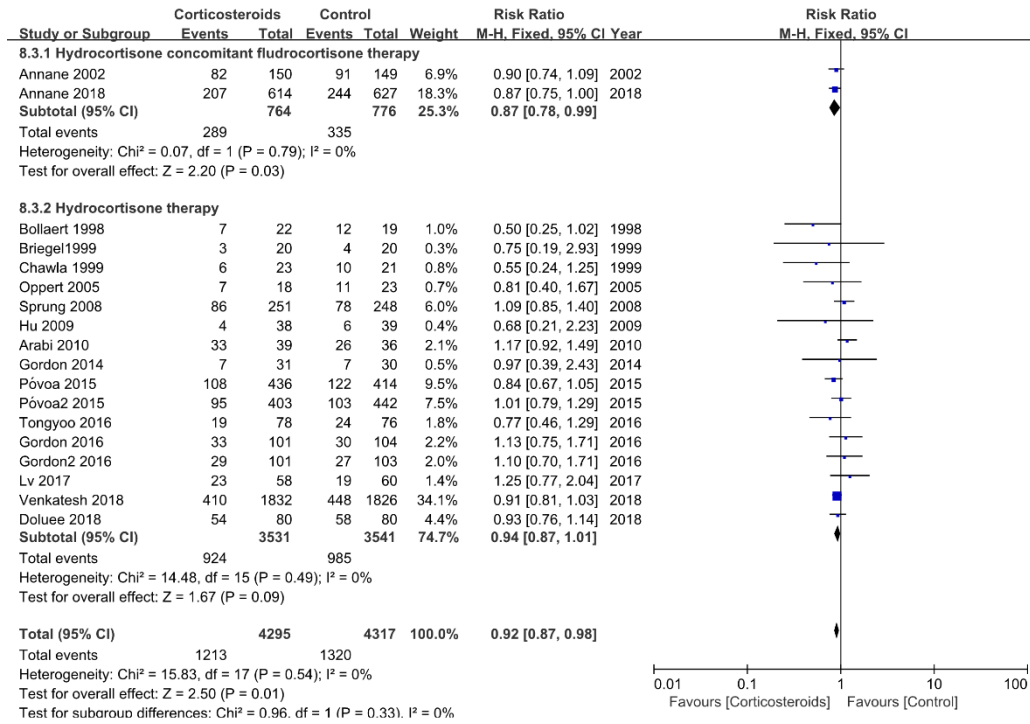

**C.**

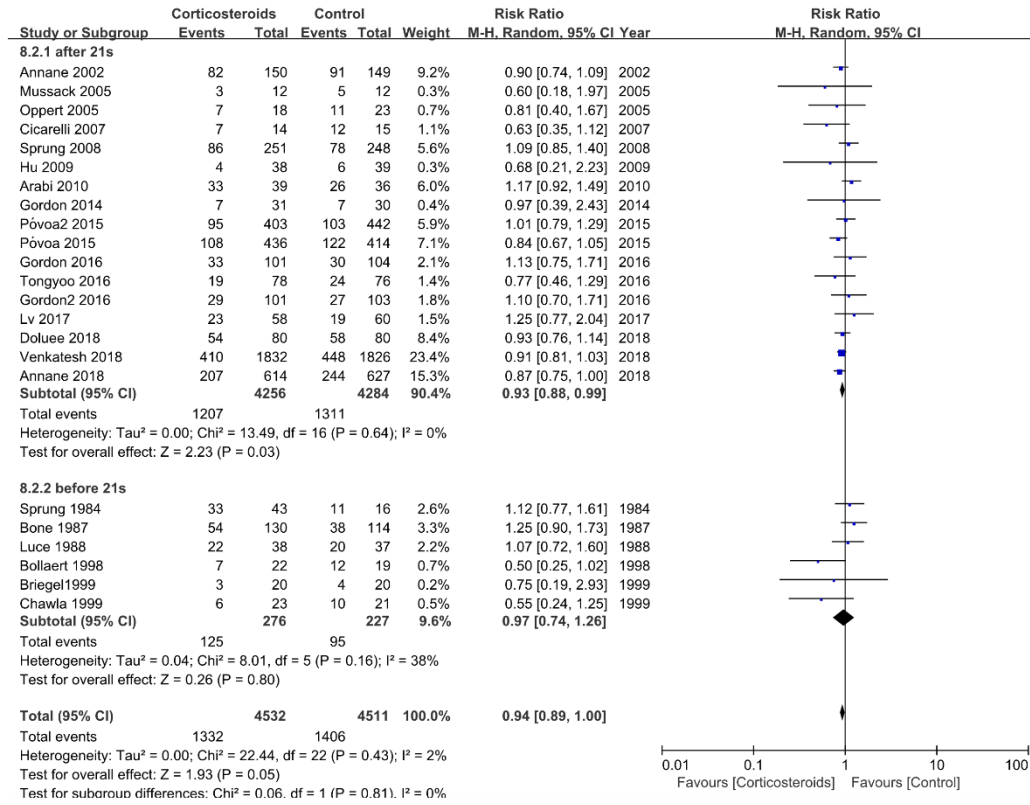

d.

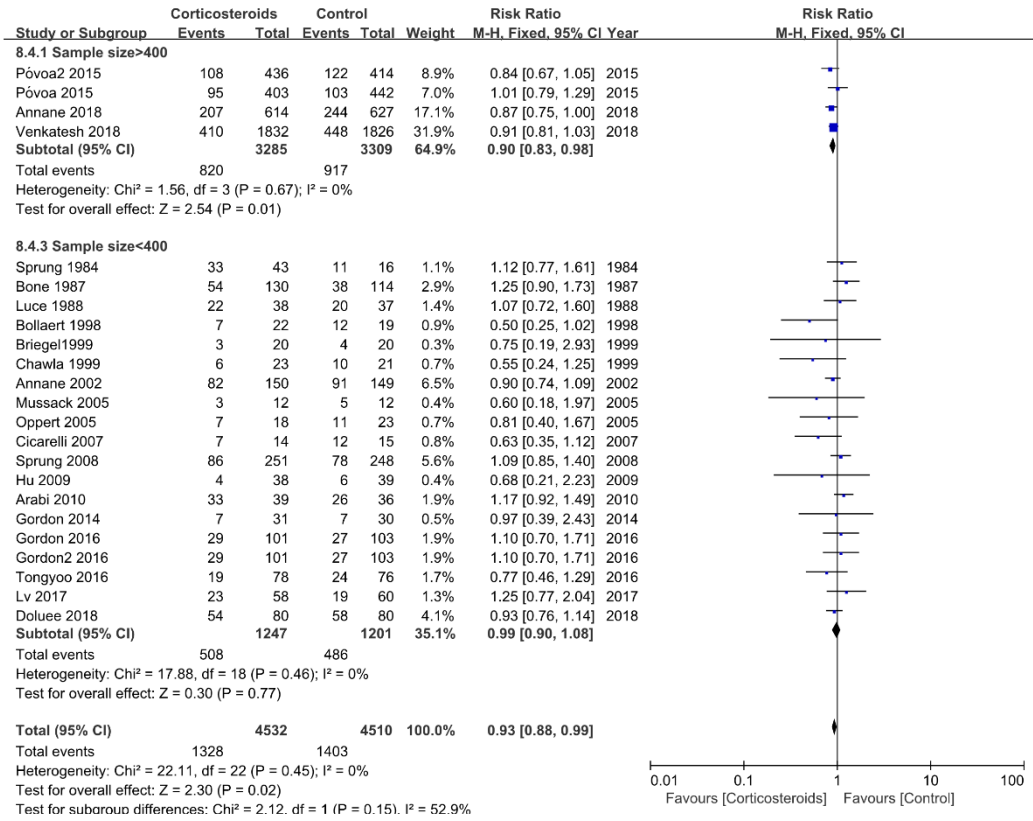

Supplement: f1 [file 3175047.f1.pdf]
